# Supplementary material for: Polypyrrole and activated carbon enriched MnCo2O4 ternary composite as efficient electrode material for hybrid supercapacitors
Source: Royal Society of Chemistry journal article supplement (doi:10.1039/d4nr00828f), 2024-01-01
Supplement: d4nr00828f1.pdf [file d4nr00828f1.pdf]

1 **Polypyrrole and Activated Carbon Enriched MnCo<sub>2</sub>O<sub>4</sub> Ternary Composite as**  
2 **Efficient Electrode Material for Hybrid Supercapacitors**

3 **Simran Kour, Pawanpreet Kour, A. L. Sharma\***

4 Department of Physics, Central University of Punjab, Bathinda, Punjab, India-151401

5 \*Corresponding author: [alsharma@cup.edu.in](mailto:alsharma@cup.edu.in)

6 ***Supporting Information (SI)***

7 **1. Electrode preparation method**

8 The electrodes were prepared by blending the synthesized active material, PVDF (binder), and  
9 carbon black (conductive element) in a ratio of 8:1:1 to get consistent slurry with the addition of  
10 N-Methyl-2-pyrrolidone (NMP). Nickel foam with area of 1 cm<sup>2</sup> was then coated with this slurry  
11 and dried at 60 °C overnight. The separator (Whatman paper) wetted by 6M KOH electrolyte was  
12 sandwiched between the two electrodes (cathode and anode) and pressed using a hydraulic press  
13 to get the desired cell configuration.

14 **2. Electrochemical measurements**

15 The capacitive response of the electrode material corresponding to a voltage window of -1 to  
16 +1V was evaluated from CV and GCD in 2-electrode configuration. The EIS analysis was  
17 carried out for 10<sup>5</sup>-0.1 Hz of frequency at open-circuit voltage. For asymmetric supercapacitor,  
18 the voltage range was 0-1.6 V. The Formulae used for determining various parameters such as  
19 specific capacitance, energy density, and power density has been provided in **Table S1**.

20

**Table S1:** Formulae used for finding various parameters.

| Parameter                                                         | Formula                                                                    | Terms used                                                                                                       |
|-------------------------------------------------------------------|----------------------------------------------------------------------------|------------------------------------------------------------------------------------------------------------------|
| Bragg's law                                                       | $2d\sin\theta = n\lambda$                                                  | 'd' is inter-planar spacing, '2θ' is bragg's diffraction angle, 'n' is an integer, λ is the wavelength of X-ray. |
| Interplanar spacing                                               | $d = \frac{1}{\sqrt{\frac{h^2}{a^2} + \frac{k^2}{b^2} + \frac{l^2}{c^2}}}$ | (hkl) are miller indices of lattice plane, (a, b, c) are lattice parameters of the crystal.                      |
| Crystallite size, D<br>(Schherrer equation)                       | $D = \frac{K.\lambda}{\omega \times \cos\theta}$                           | K is a constant, λ is the wavelength of X-ray, 'ω' is the FWHM, '2θ' is bragg's diffraction angle.               |
| Specific capacitance, $C_{sp}$ for<br>single electrode (from CV)  | $C_{sp} = \frac{\int IdV}{m \times v \times dV}$                           | 'I' is the current, dV is the potential window, 'm' is the mass of active material, 'v' is the scan rate.        |
| Specific capacitance, $C_{sp}$ for<br>single electrode (from GCD) | $C_{sp} = \frac{2 \times I \times \Delta t}{m \times dV}$                  | 'I' is the current, 'dt' is the discharging time, 'm' is the mass of active material.                            |
| Specific capacitance, $C_{sp}$ for<br>SSC/ASC (from GCD)          | $C_{sp} = \frac{I \times \Delta t}{m \times dV}$                           | 'I' is the current, 'dt' is the discharging time, 'm' is the mass of active material.                            |
| Energy density, $E_d$<br>(from GCD)                               | $E_d = \frac{C_{sp} \times (dV)^2}{7.2}$                                   | ' $C_{sp}$ ' is the specific capacitance, dV is the voltage window.                                              |

Power density,  $P_d$

(from GCD)

Coulombic efficiency,  $\eta$

Response time,  $\tau$

(from EIS)

$$P_d = \frac{E_d \times 3.6}{\Delta t}$$

' $E_d$ ' is the energy density,  $\Delta t$  is the discharging time.

$$\eta = \frac{t_d \times 100}{t_c}$$

' $t_d$ ' is the discharging time and ' $t_c$ ' is the charging time.

$$\tau = \frac{1}{\nu}$$

' $\nu$ ' is the frequency corresponding to phase angle  $\theta = 45^\circ$ .

22

### 23 3. Results and Discussion

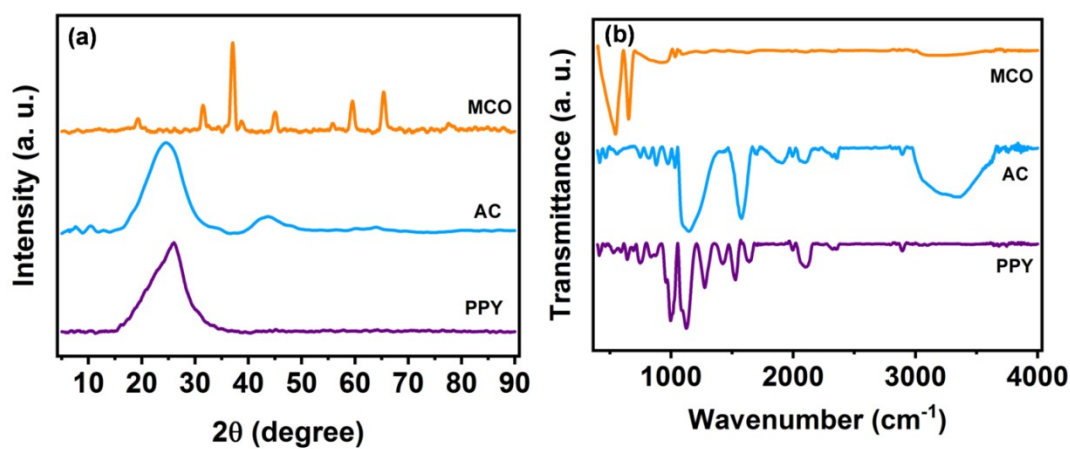

24

25

**Fig. S1:** (a) XRD and (b) FTIR patterns of MCO, AC, and PPY.

26

**Table S2:** XRD analysis for  $\text{MnCo}_2\text{O}_4$  (MCO) microspheres.

| Angle              | Lattice plane | Interplanar       | Crystallite |
|--------------------|---------------|-------------------|-------------|
| $2\theta$ (degree) | (hkl)         | spacing,<br>d (Å) | size (nm)   |
| 19.3               | (111)         | 4.6               | 9.1         |

|      |       |     |      |
|------|-------|-----|------|
| 31.5 | (220) | 2.8 | 11.2 |
| 37.1 | (311) | 2.4 | 11.1 |
| 38.7 | (222) | 2.3 | 11.9 |
| 45.3 | (400) | 2.0 | 11.4 |
| 55.5 | (422) | 1.6 | 14.2 |
| 59.5 | (511) | 1.5 | 10.7 |
| 65.3 | (440) | 1.4 | 10.6 |

27

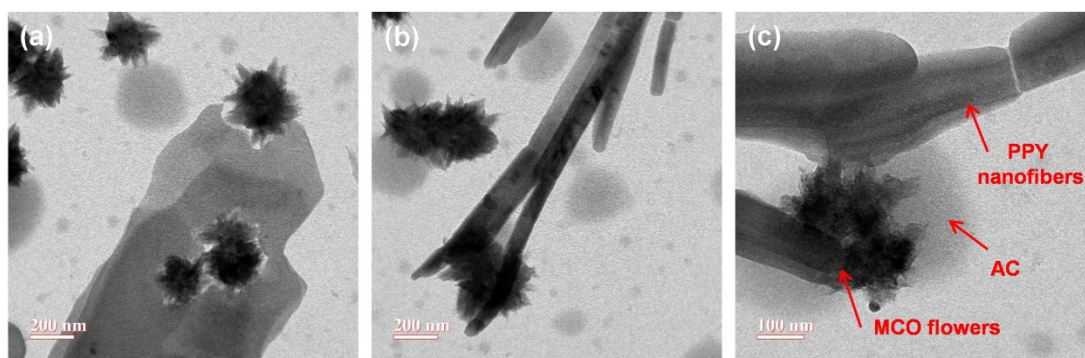

28

29

**Fig. S2: (a-c) TEM images of MAP-20 at different resolutions.**

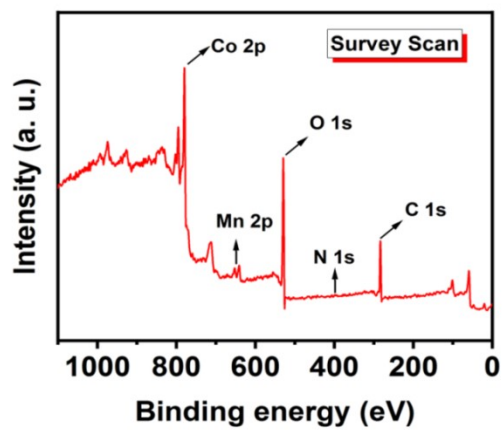

30

31

**Fig. S3: XPS survey scan of MAP-20.**

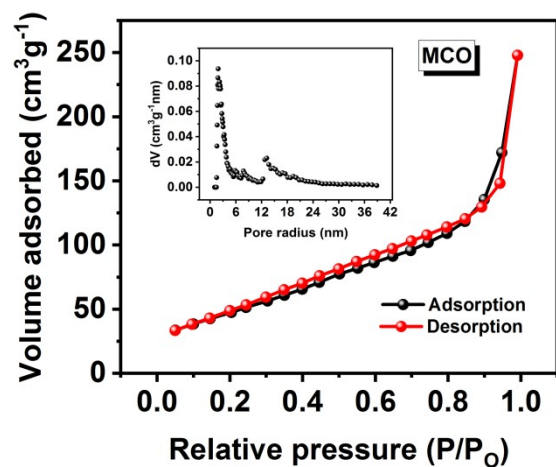

32

33

**Fig. S4:** BET analysis of pristine MnCo<sub>2</sub>O<sub>4</sub> (MCO).

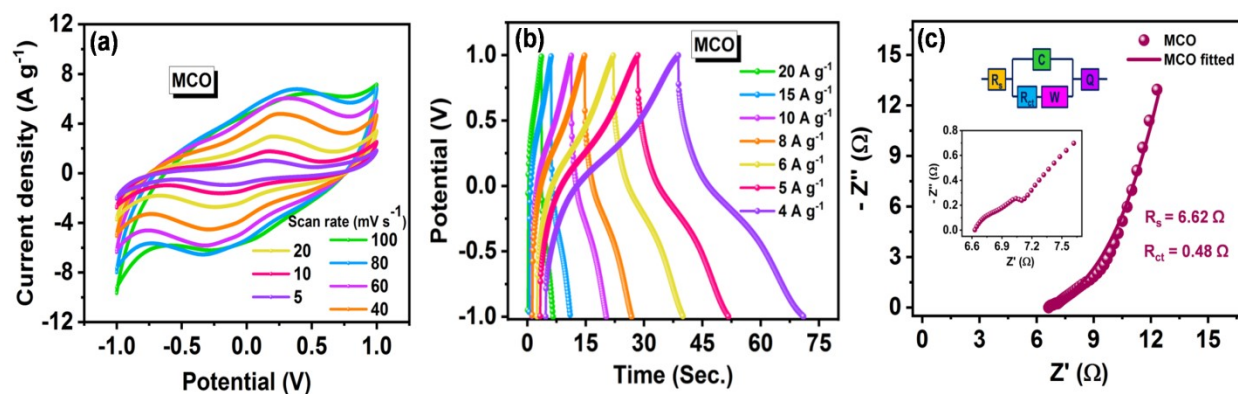

34

**Fig. S5:** (a) CV curves of MCO, (b) GCD curves of MCO and (c) Nyquist plot of MCO with fitted circuit.

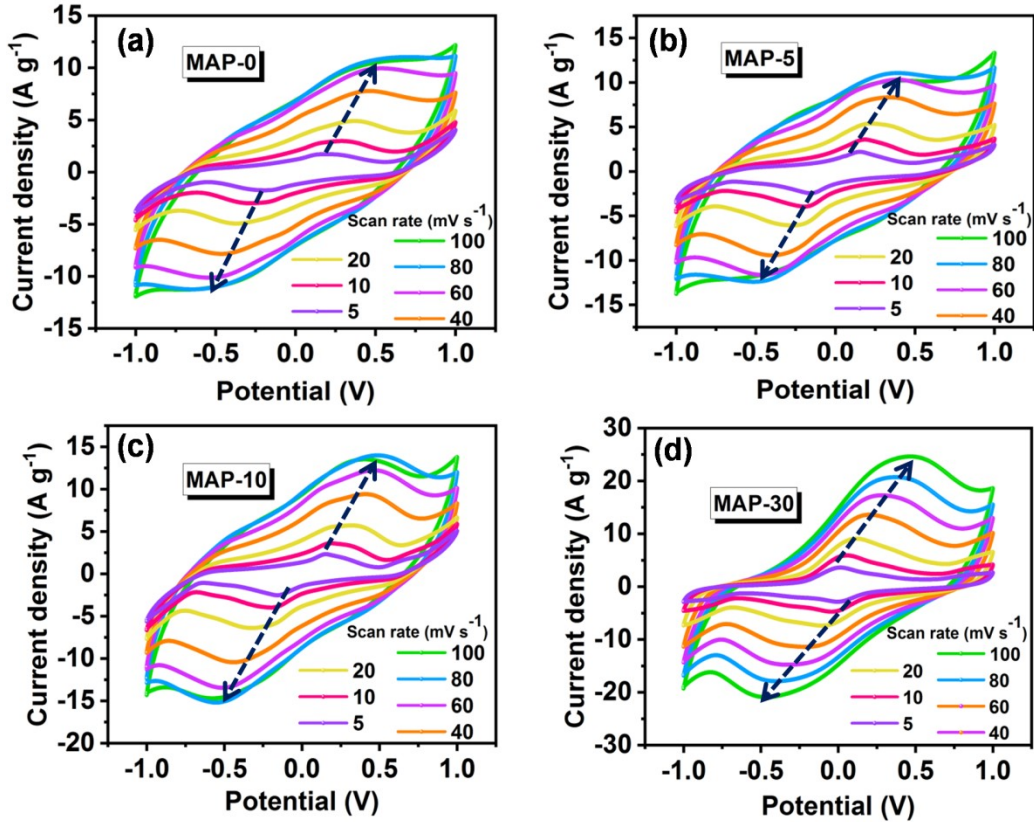

37

38

**Fig. S6: (a-d) CV of MAP-x (x = 0, 5, 10, and 30) at various scan rates.**

39 **Power law**

40 The power law gives the correlation of the current ( $i$ ) and scan rates ( $v$ ) as follows:

41 
$$i = av^b \tag{S1}$$

42 where,  $a$  and  $b$  are adjustable constants.

43 **Trasatti method**

44 The total capacitance  $C_T$  of the electrode material is given by the combination of capacitance

45 contribution of outer surface ( $C_o$ ) and inner surface ( $C_i$ ) and is given by the following formula:

46  $C_T = C_o + C_i$  (S2)

47  $C = const. \times v^{-1/2} + C_o$  (S3)

48  $\frac{1}{C} = const. \times v^{1/2} + \frac{1}{C_T}$

49 (S4)

50 where,  $C$  is the sp. capacitance calculated from the CV data.

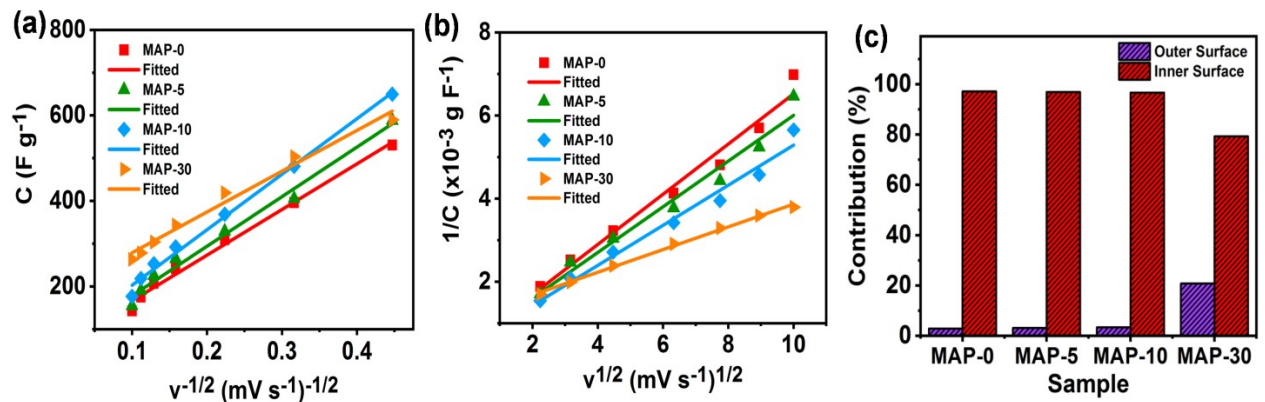

51

52

**Fig. S7: (a-c) Charge storage kinetics of MAP-x (x = 0, 5, 10, and 30).**

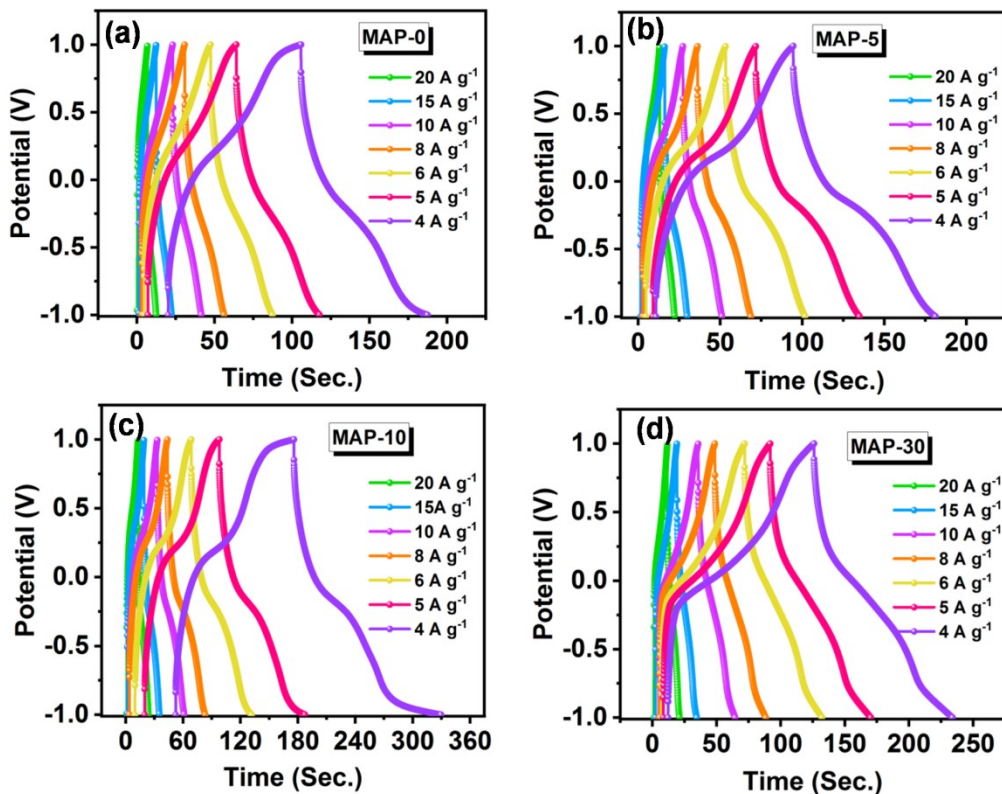

53

54

**Fig. S8:** (a-d) GCD of MAP-x ( $x = 0, 5, 10,$  and  $30$ ) at various scan rates.

55

**Table S3:** Comparison of supercapacitive performance of the prepared samples with literature.

| Material                     | $C_{sp}$<br>( $Fg^{-1}$ ) | Voltage<br>window<br>(V) | ASC/SSC | $E_d$<br>( $Wh kg^{-1}$ ) | Pd<br>( $kW kg^{-1}$ ) | Stability,<br>%<br>(cycles) | Reference    |
|------------------------------|---------------------------|--------------------------|---------|---------------------------|------------------------|-----------------------------|--------------|
| $NiCo_2O_4/NF@PPY$           | 1717 $C g^{-1}$           | 0-1.6                    | ASC     | 68.9                      | 1.77                   | 89.2<br>(10,000)            | <sup>1</sup> |
| $MnCo_2O_4-$<br>graphite@PPY | 2364                      | 0-1.6                    | ASC     | 25.7                      | 16.1                   | 85.5<br>(10,000)            | <sup>2</sup> |
| $NiCo_2O_4@PPY$              | 2244                      | 0-1.6                    | ASC     | 58.8                      | 0.36                   | 89.2                        | <sup>3</sup> |



---

|                                                                               |                          |       |     |      |      |          |    |
|-------------------------------------------------------------------------------|--------------------------|-------|-----|------|------|----------|----|
|                                                                               | (1 A g <sup>-1</sup> )   |       |     |      |      | (5,000)  |    |
| NiCo <sub>2</sub> O <sub>4</sub> /CNF@PPY                                     | 910                      | 0-1.5 | ASC | 40.8 | 0.73 | 88.0     | 4  |
|                                                                               | (1 A g <sup>-1</sup> )   |       |     |      |      | (10,000) |    |
| NiCo <sub>2</sub> O <sub>4</sub> /Co <sub>3</sub> S <sub>4</sub> /MnS<br>@PPY | 2557                     | 0-1.6 | ASC | 81.1 | 0.80 | 83.6     | 5  |
|                                                                               | (1 A g <sup>-1</sup> )   |       |     |      |      | (20,000) |    |
| MgCo <sub>2</sub> O <sub>4</sub> /PPY                                         | 988                      | 0-1.6 | ASC | 40.0 | 1.54 | 84.0     | 6  |
|                                                                               | (1 A g <sup>-1</sup> )   |       |     |      |      | (10,000) |    |
| MnNi <sub>2</sub> O <sub>4</sub> /PPY                                         | 304                      | 0-1.6 | ASC | 35.9 | 0.80 | --       | 7  |
|                                                                               | (1 A g <sup>-1</sup> )   |       |     |      |      |          |    |
| CC@NiCo <sub>2</sub> O <sub>4</sub> @PPY                                      | 1687                     | 0-1.5 | ASC | 46.5 | 0.72 | 80.0     | 8  |
|                                                                               | (1 A g <sup>-1</sup> )   |       |     |      |      | (10,000) |    |
| NiCo <sub>2</sub> O <sub>4</sub> @PANI                                        | 561                      | 0-1.2 | ASC | 6.4  | 0.28 | 86.2     | 9  |
|                                                                               | (10 mV s <sup>-1</sup> ) |       |     |      |      | (3,000)  |    |
| ZnCo <sub>2</sub> O <sub>4</sub> @PANI                                        | 720                      | 0-0.5 | --  | --   | --   | 96.4     | 10 |
|                                                                               | (10 mV s <sup>-1</sup> ) |       |     |      |      | (10,000) |    |
| CuCo <sub>2</sub> O <sub>4</sub> /GO@PANI                                     | 312.7                    | 0-1.2 | SSC | 62.5 | 5.99 | 84.2     | 11 |
|                                                                               | (1 A g <sup>-1</sup> )   |       |     |      |      | (5,000)  |    |
| CoFe <sub>2</sub> O <sub>4</sub> /PANI/GO                                     | 346.9                    | 0-1.2 | SSC | 69.3 | 5.98 | 79.0     | 12 |
|                                                                               | (1 A g <sup>-1</sup> )   |       |     |      |      | (5,000)  |    |

---

---

|                                           |                                                  |       |     |                               |      |                   |               |
|-------------------------------------------|--------------------------------------------------|-------|-----|-------------------------------|------|-------------------|---------------|
| Fe-MnCo <sub>2</sub> O <sub>4</sub> @PPY  | 422.4<br>(2 mA cm <sup>-2</sup> )                | 0-1   | SSC | 519.9<br>mWh cm <sup>-2</sup> | --   | 94.7<br>(7,000)   | <sup>13</sup> |
| NiMoO <sub>4</sub> /rGO/PANI              | 1150 C g <sup>-1</sup><br>(1 A g <sup>-1</sup> ) | 0-1.7 | ASC | 82.43                         | 0.85 | 94.5<br>(10,000)  | <sup>14</sup> |
| NiCo <sub>2</sub> O <sub>4</sub> /CF@PANI | 369 mAh g <sup>-1</sup>                          | 0-1.5 | ASC | 60.6                          | 2.32 | --                | <sup>15</sup> |
| MnCo <sub>2</sub> O <sub>4</sub> -AC@PPY  | 945.77<br>(5 mV s <sup>-1</sup> )                | 0-1.6 | ASC | 88.12                         | 1.6  | 89.68<br>(10,000) | This work     |

---

56

## 57 References

- 58 1. R. BoopathiRaja and M. Parthibavarman, *Electrochimica Acta*, 2020, **346**, 136270.  
59 2. F. Wang, X. Lv, L. Zhang, H. Zhang, Y. Zhu, Z. Hu, Y. Zhang, J. Ji and W. Jiang, *Journal of Power*  
60 *Sources*, 2018, **393**, 169-176.  
61 3. D. Kong, W. Ren, C. Cheng, Y. Wang, Z. Huang and H. Y. Yang, *ACS applied materials & interfaces*,  
62 2015, **7**, 21334-21346.  
63 4. T. H. Ko, D. Lei, S. Balasubramaniam, M.-K. Seo, Y.-S. Chung, H.-Y. Kim and B.-S. Kim,  
64 *Electrochimica Acta*, 2017, **247**, 524-534.  
65 5. L. He, Z. Guo, G. Wang and M. Li, *Journal of Energy Storage*, 2024, **79**, 110130.  
66 6. S. Sathishkumar, M. Karthik, R. Boopathiraja, M. Parthibavarman, S. Nirmaladevi and S.  
67 Sathishkumar, *J Mater Sci.: Mater Electron* 2022, **33**, 21600-21614.  
68 7. A. Sathiyar, E. Elaiyappillai, S.-F. Wang, S. Dhineshkumar and P. M. Johnson, *New Journal of*  
69 *Chemistry*, 2024, **48**, 3080-3088.  
70 8. J. Yu, D. Yao, Z. Wu, G. Li, J. Song, H. Shen, X. Yang, W. Lei, F. Wu and Q. Hao, *ACS Applied Energy*  
71 *Materials*, 2021, **4**, 3093-3100.  
72 9. X. Li, H. Xie, Y. Feng, Y. Qu, L. Zhai, H. Sun, X. Liu and C. Hou, *Journal of Applied Polymer Science*,  
73 2023, **140**, e54580.  
74 10. A. Kathalingam, S. Ramesh, H. M. Yadav, J.-H. Choi, H. S. Kim and H.-S. Kim, *Journal of Alloys and*  
75 *Compounds*, 2020, **830**, 154734.  
76 11. S. Verma, V. K. Pandey and B. Verma, *Synthetic Metals*, 2022, **286**, 117036.  
77 12. S. Verma, T. Das, V. K. Pandey and B. Verma, *Journal of Molecular Structure*, 2022, **1266**,  
78 133515.

- 79 13. Z. Chen, X. Zu, L. Chen, Y. Qi, W. Jian, Y. Wu, W. Zhang, X. Lin, G. Yi and Q. Liu, *ACS Applied*  
80 *Energy Materials*, 2022, **5**, 5937-5946.
- 81 14. H. M. Fahad, R. Ahmad, F. Shaheen, A. A. Ifseisi, M. H. Aziz and Q. Huang, *Electrochimica Acta*,  
82 2024, 143756.
- 83 15. S. K. Shinde, S. S. Karade, N. T. N. Truong, S. S. Veer, S. F. Shaikh, A. M. Al-Enizi, A. D. Jagadale, H.  
84 M. Yadav, M. S. Tamboli and C. Park, *Journal of Energy Storage*, 2024, **78**, 109960.

85
